## RESEARCH ARTICLE

# A rapid, simple and sensitive LC-MS/MS method for lenvatinib quantification in human plasma for therapeutic drug monitoring

Martina Zanchetta<sup>1,2</sup>, Valentina Iacuzzi<sup>1</sup>, Bianca Posocco<sup>1</sup>, Giorgia Bortolin<sup>1</sup>, Ariana Soledad Poetto<sup>1,3</sup>, Marco Orleni<sup>1</sup>, Giovanni Canil<sup>1</sup>, Michela Guardascione<sup>1</sup>, Luisa Foltran<sup>4</sup>, Valentina Fanotto<sup>4</sup>, Fabio Puglisi<sup>4,5</sup>, Sara Gagno<sup>1</sup>, Giuseppe Toffoli<sup>1</sup>✉\*

**1** Experimental and Clinical Pharmacology Unit, Centro di Riferimento Oncologico di Aviano (CRO) IRCCS, Aviano, Italy, **2** Department of Chemical and Pharmaceutical Sciences, University of Trieste, Trieste, Italy, **3** Doctoral School in Pharmacological Sciences, University of Padova, Padova, Italy, **4** Unit of Medical Oncology and Cancer Prevention, Centro di Riferimento Oncologico di Aviano (CRO) IRCCS, Aviano, Italy, **5** Department of Medicine (DAME), University of Udine, Udine, Italy

✉ These authors contributed equally to this work.

\* [gtoffoli@cro.it](mailto:gtoffoli@cro.it)

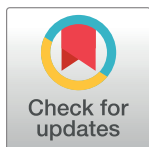

## OPEN ACCESS

**Citation:** Zanchetta M, Iacuzzi V, Posocco B, Bortolin G, Poetto AS, Orleni M, et al. (2021) A rapid, simple and sensitive LC-MS/MS method for lenvatinib quantification in human plasma for therapeutic drug monitoring. PLoS ONE 16(10): e0259137. <https://doi.org/10.1371/journal.pone.0259137>

**Editor:** A. M. Abd El-Aty, Cairo University, EGYPT

**Received:** August 5, 2021

**Accepted:** October 13, 2021

**Published:** October 26, 2021

**Copyright:** © 2021 Zanchetta et al. This is an open access article distributed under the terms of the [Creative Commons Attribution License](https://creativecommons.org/licenses/by/4.0/), which permits unrestricted use, distribution, and reproduction in any medium, provided the original author and source are credited.

**Data Availability Statement:** All relevant data are within the manuscript and its [Supporting information](#) files.

**Funding:** The authors received no specific funding for this work.

**Competing interests:** The authors declare that they have no conflicts of interest with the exception of Dr. Michela Guardascione that declares the participation as a speaker in webinars granted by pharmaceutical industries (Eisai, MSD) and Prof. Fabio Puglisi, who discloses honoraria for advisory

## Abstract

Lenvatinib (LENVA) is an oral antineoplastic drug used for the treatment of hepatocellular carcinoma and thyroid carcinoma. LENVA therapeutic drug monitoring (TDM) should be mandatory for a precision medicine to optimize the drug dosage. To this end, the development of a sensitive and robust quantification method to be applied in the clinical setting is essential. The aim of this work was to develop and validate a sensitive, rapid, and cost-effective LC-MS/MS method for the quantification of LENVA in human plasma. On this premise, sample preparation was based on a protein precipitation and the chromatographic separation was achieved on a Synergi Fusion RP C18 column in 4 min. The method was completely and successfully validated according to European Medicines Agency (EMA) and Food and Drug Administration (FDA) guidelines, with good linearity in the range of 0.50–2000 ng/mL ( $R \geq 0.9968$ ). Coefficient of variation (CV) for intra- and inter-day precision was  $\leq 11.3\%$  and accuracy ranged from 96.3 to 109.0%, internal standard normalized matrix effect CV% was  $\leq 2.8\%$  and recovery was  $\geq 95.6\%$ . Successful results were obtained for sensitivity (signal to noise (S/N) ratio  $>21$ ) and selectivity, dilution integrity (CV%  $\leq 4.0\%$  and accuracy 99.9–102%), and analyte stability under various handling and storage conditions both in matrix and solvents. This method was applied to quantify LENVA in patient's plasma samples and covered the concentration range achievable in patients. In conclusion, a sensitive and robust quantification method was developed and validated to be applied in the clinical setting.

## Introduction

Lenvatinib (LENVA) is an oral multikinase inhibitor with antiangiogenic and antiproliferative properties, that targets VEGF receptors 1–3, FGF receptors 1–4, PDGF receptor  $\alpha$ , RET, and

boards or activities as a speaker from Amgen, Astrazeneca, Daichii-Sankyo, Eisai, Eli Lilly, Ipsen, MSD, Novartis, Pierre-Fabre, Pfizer, Roche, Seagen, Takeda. In addition, he received research funding from Astrazeneca, Eisai and Roche, and travel grants from Celgene, GlaxoSmithKline and Roche. These disclosures are not related to the research work reported in the present manuscript and this does not alter our adherence to PLOS ONE policies on sharing data and materials.

KIT [1]. It was approved by Food and Drug Administration (FDA) and European Medicines Agency (EMA) as monotherapy for the treatment of differentiated thyroid carcinoma (DTC), and hepatocellular carcinoma (HCC) [2, 3]. FDA approved LENVA also for the treatment of advanced renal cell carcinoma [2].

Oral drugs in chronic administration, such as LENVA, are becoming a new strategy in cancer therapy and Therapeutic Drug Monitoring (TDM) should be mandatory to modulate the drug dosage since intra- and inter-patients variations in drug plasma concentrations can occur. Many reports indicate that, for chronically administered oral drugs, minimum drug concentration at the steady-state ( $C_{\min}$ ) is one of the best pharmacokinetic (PK) parameters to be used for adjusting the drug dosage in cancer patients [4].

In addition to being a good candidate for TDM, LENVA has no active metabolites, which makes PK analysis easier as metabolites determinations are devoid of clinical utility. Concerning the exposure-response relationship of this drug, Hata et al. observed that HCC patients with a  $C_{\min}$  higher than 42.68 ng/mL had a better objective response rate (ORR) than those with lower  $C_{\min}$  [5]. Nagahama and colleagues reported a  $C_{\min}$  threshold for LENVA toxicity of 88 ng/mL in Japanese DTC patients [6].

An exploratory target plasma concentration ( $C_{\min}$  of 51.5 ng/mL) has been suggested for LENVA TDM [4], but due to the small number of studies still reported, further validations are required.

To apply TDM in the clinical routine, the development of sensitive and robust quantification method is essential. At the best of our knowledge, the published liquid chromatography-tandem mass spectrometry (LC-MS/MS) methods for LENVA quantification in human plasma are reported in Table 1.

**Table 1. Comparison between the proposed and previously reported LC-MS/MS methods for quantification of LENVA in human plasma.**

| Ref.                | Analyte                                                                                                                                                                                                                                                                                                                                                                                                                                                                                  | Sample Volume ( $\mu$ L) | Extraction Method                                  | Runtime (min) | Linearity Range   |
|---------------------|------------------------------------------------------------------------------------------------------------------------------------------------------------------------------------------------------------------------------------------------------------------------------------------------------------------------------------------------------------------------------------------------------------------------------------------------------------------------------------------|--------------------------|----------------------------------------------------|---------------|-------------------|
| [7]                 | LENVA and 4 metabolites (M1: Decyclopropylation; M2: demethylation; M3: N-oxidation; M5 O-dearylation), ER-227326 (IS)                                                                                                                                                                                                                                                                                                                                                                   | 250                      | PP with supernatant evaporation and re-dissolution | 21            | 0.25–50 ng/mL     |
| [8]                 | LENVA and LENVA-D <sub>4</sub> (IS)                                                                                                                                                                                                                                                                                                                                                                                                                                                      | 200                      | LLE                                                | 8             | 10.20–501.6 pg/mL |
| [9]                 | LENVA, propranolol (IS)                                                                                                                                                                                                                                                                                                                                                                                                                                                                  | 250                      | PP with supernatant evaporation and re-dissolution | 15            | 9.6–200 ng/mL     |
| [10]                | alectinib, cobimetinib, LENVA, nintedanib, osimertinib, palbociclib, ribociclib, vismodegib, vorinostat, alectinib-D <sub>8</sub> (IS), LENVA-D <sub>5</sub> (IS), nintedanib- <sup>13</sup> C <sub>3</sub> (IS), osimertinib- <sup>13</sup> C <sub>3</sub> (IS), palbociclib-D <sub>8</sub> (IS), ribociclib-D <sub>6</sub> (IS), vismodegib- <sup>13</sup> C <sub>7</sub> (IS), vorinostat- <sup>13</sup> C <sub>6</sub> (IS), cobimetinib- <sup>13</sup> C <sub>6</sub> (IS)          | 50                       | PP                                                 | 4             | 10–200 ng/mL      |
| [11]                | LENVA and LENVA-D <sub>4</sub> (IS)                                                                                                                                                                                                                                                                                                                                                                                                                                                      | 100                      | SPE                                                | 6             | 0.2–1000 ng/mL    |
| [12]                | Axitinib, LENVA, afatinib, bosutinib, cabozantinib, dabrafenib, osimertinib, ruxolitinib, nilotinib, trametinib, afatinib-D <sub>6</sub> (IS), bosutinib-D <sub>9</sub> (IS), dabrafenib-D <sub>9</sub> (IS), LENVA-D <sub>5</sub> (IS), osimertinib- <sup>13</sup> C <sub>3</sub> (IS), trametinib- <sup>13</sup> C <sub>6</sub> (IS), axitinib- <sup>13</sup> C <sub>3</sub> (IS), cabozantinib-D <sub>4</sub> (IS), nilotinib-D <sub>6</sub> (IS) and ruxolitinib-D <sub>4</sub> (IS) | 50                       | PP                                                 | 7             | 2–500 ng/mL       |
| [13]                | sorafenib, LENVA, apatinib, sorafenib D <sub>3</sub> (IS), LENVA D <sub>4</sub> (IS), apatinib D <sub>8</sub> (IS)                                                                                                                                                                                                                                                                                                                                                                       | 100                      | PP with dilution in MP A                           | 3.5           | 1.25–40 ng/mL     |
| The proposed method | LENVA and LENVA-D <sub>4</sub> (IS)                                                                                                                                                                                                                                                                                                                                                                                                                                                      | 100                      | PP                                                 | 4             | 0.5–2000 ng/mL    |

IS: internal standard; LLE: liquid-liquid extraction; MP A: mobile phase A; PP: protein precipitation; SPE: solid-phase extraction.

<https://doi.org/10.1371/journal.pone.0259137.t001>

Dubbelman et al. [7] quantified LENVA and four metabolites in three different matrices (human plasma, urine, and feces) and LENVA alone in whole blood. The validated analytical range in plasma was 0.25–50 ng/mL, which was lower than the target  $C_{\min}$  (51.5 ng/mL). Moreover, this method is time-consuming (twenty-one min of runtime and a sample preparation based on protein precipitation (PP) followed by supernatant evaporation and re-dissolution steps) and requires a large sample volume (250  $\mu$ L).

Ogawa-Morita and colleagues partially modified Dubbelman's method extending the linear range (9.6–200 ng/mL) [9] and reducing analysis run time (15 min) but sample preparation remained time-consuming.

Srikanth et al.'s method [8] was relatively fast (8 min), but required a large sample volume (200  $\mu$ L), a complex sample preparation (liquid-liquid extraction-LLE) and the validated analytical range (10.20–501.6 pg/mL) was below the target LENVA  $C_{\min}$ .

Recently, Sueshige and colleagues [11] developed a LC-MS/MS quantification method for LENVA with a reduced sample volume (100  $\mu$ L), short runtime (4 min), and adequate range for TDM application (0.2–1000 ng/mL). Nonetheless, the sample preparation was based on solid-phase extraction (SPE) that could make this method complex and laborious.

In the literature three other methods were reported for LENVA quantification with other 8, 9 or 2 kinase inhibitors, respectively [10, 12, 13]. These methods overcome the above-mentioned limitations: they required a small sample volume (50/100  $\mu$ L), had a fast chromatographic run (between 3.5 and 7 min) and a simple sample preparation (PP). Concentration ranges were suitable for the target  $C_{\min}$  of 51.5 ng/mL with the exception of the method developed by Ye et al. [13] (1.25–40 ng/mL).

However, the quantification of other kinase inhibitors was not necessary for our purpose and we considered of interest the possibility to have a wider concentration range in order to obtain a method useful not only for LENVA  $C_{\min}$  monitoring in patients with HCC but also for PK investigations in patients affected by other pathologies and treated with LENVA at higher doses (*e.g.*, LENVA is administered at the dose of 24 mg/day in patients with DTC). For these reasons, we developed and validated according to EMA and FDA guidelines, a LC-MS/MS method for the quantification of LENVA in a wide concentration range to be used for cancer patients' plasma samples. It required a relatively low sample volume, an easy and quick sample processing based on PP, and a reasonable runtime.

## Material and methods

### Chemicals and reagents

The analytical standard of LENVA (batch: 6-JTN-66-1; purity: 98%) and LENVA-D<sub>4</sub> (batch: CS-SI-AAA-0949-01, chemical and isotopic purity: 99.18% and 99.48%, respectively) were supplied by Toronto Research and Chemical Inc. (North York, Ontario, Canada) and Clear-synth Labs Ltd. (Mumbai, India), respectively. Formic acid and LC-MS grade isopropanol were provided by Merck-Sigma (Milano, Italy), while LC-MS grade methanol was supplied by Carlo Erba (Milano, Italy).

"Type 1" ultrapure water was produced at our laboratory by a Milli-Q<sup>®</sup> IQ 7000 system (Merck). Plasma/K-EDTA from healthy donors to prepare standard calibration curves and quality control samples (QCs) was provided by the Transfusion Unit of our Institute.

### Standard solutions preparation

Stock solutions of LENVA and LENVA-D<sub>4</sub> were prepared in DMSO at the concentration of 1 mg/mL. Two different stock solutions were obtained for LENVA: one for the preparation of the calibration curve and the other for QCs. To obtain the working solutions for the calibration

curve (from A to H), the stock solution of LENVA was diluted with methanol to achieve the final concentrations of: 40.0, 20.0, 10.0, 2.00, 0.80, 0.30, 0.06 and 0.01  $\mu\text{g/mL}$ . The same procedure was applied also to obtain the working solutions for the QCs with a final concentration of 30.0, 1.50 and 0.03  $\mu\text{g/mL}$ . IS stock solution was also diluted in acidified methanol with 0.10% formic acid to obtain the final concentration of 50.0  $\text{ng/mL}$ . This solution was directly used to perform protein precipitation during sample processing.

### Calibration curve and QCs sample preparation

Every day, an eight-point calibration curve (A to H) and triplicates of each QC concentration were freshly prepared in plasma. A blank sample (plasma processed without IS) and a zero-blank sample (plasma processed including IS) were analyzed before each analysis. The preparation of calibrators and QCs samples was conducted as follows: 95  $\mu\text{L}$  of pooled blank human plasma were added with 5  $\mu\text{L}$  of working solutions (dilution 1:20) and vortex-mixed for 10 s, obtaining the final concentrations of 2000, 1000, 500, 100, 40.0, 15.0, 3.00 and 0.50  $\text{ng/mL}$  for the calibration curve and 1500, 75.0 and 1.50  $\text{ng/mL}$  for QCs. One hundred  $\mu\text{L}$ -aliquots of QCs were prepared and stored at  $-80^\circ\text{C}$  to allow the assessment of analytes long-term stability and to be used as controls in future analyses.

### Samples handling

A hundred  $\mu\text{L}$  of each calibrator and QC (95  $\mu\text{L}$  plasma + 5  $\mu\text{L}$  working solution) or patient's plasma sample were added with 500  $\mu\text{L}$  of cold IS working solution to precipitate plasma proteins, vortex-mixed for 10 s and centrifuged for 25 min at 16200 g at  $4^\circ\text{C}$ . Finally, the clean supernatant was transferred into auto-sampler glass vials and 4  $\mu\text{L}$  were injected in the LC-MS/MS apparatus for the analysis.

### Chromatography and mass spectrometry conditions

The method was developed and validated using a SIL-20AC XR autosampler and Nexera LC-20AD UFLC XR pumps (Shimadzu, Tokyo, Japan) coupled with an API 4000 triple quadrupole spectrometer (AB SCIEX, Massachusetts, USA). The extracted samples were injected into a Synergi-Fusion C18 column (4  $\mu\text{m}$ , 80  $\text{\AA}$ , 30 x 2 mm I.D.) coupled with a Security Guard Cartridge (Fusion, C18, 4 x 2.0 mm), both produced by Phenomenex (Castel Maggiore (BO), Italy). The oven temperature was set at  $50^\circ\text{C}$ . The mobile phase was composed by ultrapure water plus 0.10% formic acid (v/v) (eluent A) and methanol/isopropanol (90:10, v/v) with 0.10% of formic acid (v/v) (eluent B).

The spectrometer was equipped with an electrospray source (TurboIonSpray<sup>®</sup> probe) and worked in positive ion mode. Compound and source MS parameters were optimized by directly injecting a 100  $\text{ng/mL}$  solution of LENVA and IS with a flow rate of 20.0  $\mu\text{L}/\text{min}$ . Analyst software (1.6.3 version) was used for both data acquisition and quantification.

### Validation procedures

A full validation of the proposed method was conducted according to FDA and EMA guidelines on bioanalytical method validation [14, 15] performing the below described evaluations.

**Recovery, matrix effect and selectivity.** Recovery was determined by preparing in quintuplicate the QCs at each concentration level and comparing the analyte peak area ratio of plasma samples spiked both before and after protein precipitation.

Matrix effect was evaluated with different strategies during method development and validation. First, a qualitative estimation was performed through post-column infusion using a

standard solution of LENVA in methanol with 0.10% formic acid (v/v) at a concentration of 100 ng/mL with a flow rate of 20  $\mu$ L/min. Then, a quantitative evaluation of matrix effect was performed using 6 replicates of the QCs (QCL, QCM, QCH) and IS using matrix from 6 different donors (3 females and 3 males) and by comparing the peak area ratio of post extraction QCs (QC working solution added to extracted plasma sample) or IS with those obtained from QCs or IS prepared in pure methanol. Moreover, the IS normalized matrix effect was calculated as the ratio between the matrix effect of analyte and the matrix effect of IS. The coefficient of variation (CV%) of IS normalized matrix effect should not be greater than 15%.

Selectivity was investigated by analyzing 6 blank human plasma samples obtained from 6 different donors (3 females and 3 males). These samples should be free of interference at the retention time of the analyte of interest (a response lower than 20% of the lower limit of quantification (LLOQ) for LENVA and lower than 5% for the IS).

**Linearity and sensitivity.** Linearity was assessed by preparing 8 calibration curves, which were freshly processed during 8 different working days. Calibration curves were obtained using a weighted quadratic regression model ( $1/x^2$ ). The Pearson's determination coefficient R was calculated for each calibration curve and the comparison between the nominal and back-calculated concentrations of each calibrator (expressed as accuracy) was checked. At least 75% of the calibrators, including the LLOQ and the upper limit of quantification (ULOQ), had to be within 85–115% of the nominal concentration (80–120% at the LLOQ).

Sensitivity is defined by the LLOQ, which is the lowest concentration that could be measured with a precision within 20%, accuracy between 80% and 120%, and a signal-to-noise ratio (S/N)  $\geq 5$ . The LLOQ of the present method was verified by analyzing precision, accuracy, and S/N ratio obtained from 6 samples of pooled blank human plasma added with "H" (i.e. the least concentrated) working solution.

**Intra- and inter-day precision and accuracy.** Intra-day precision and accuracy were determined during a single working day by analyzing 6 replicates of the LLOQ and each QC concentration, while inter-day precision and accuracy were assessed on 5 different working days, analyzing 3 replicates of the LLOQ and each QC concentration with a calibration curve freshly prepared every day. The measured concentrations had to be within  $\pm 15\%$  of the nominal value with a CV%  $\leq 15\%$  for at least 67% of the QCs at each concentration level in each run (only one QC for each concentration level could be excluded). For the LLOQ samples, the measured concentration had to be within  $\pm 20\%$  and have a CV%  $\leq 20\%$ .

**Stability and dilution integrity.** Bench-top and long-term stability was assessed for LENVA using QCs prepared in triplicate at each concentration (QCL, QCM, QCH): bench-top stability in plasma was investigated after 4 h at room temperature; the post-processing stability of the extracted QCs was evaluated in autosampler set at 4 °C re-analyzing the samples 20, 44, 70 and 94 h after the first injection; freeze/thaw stability was assessed by analyzing 3 freshly prepared aliquots of each QCs concentration, and then again after one, two and three freeze/thaw cycles. Long-term stability was investigated both in plasma, to assess patient samples stability after storage at -80 °C, and in solvent (methanol or DMSO) to assess working solutions or stock solutions stability after storage at -20 °C and -80 °C, respectively. Stability tests were considered verified if the samples tested did not exceed  $\pm 15\%$  from the nominal concentrations at each QCs concentration.

Dilution integrity was evaluated on a plasma sample at a LENVA concentration of 3000 ng/mL, using 1:10 and 1:100 dilution factors, using pooled plasma as a diluting agent. Each dilution factor was tested in quintuplicate and the measured concentrations had to be within  $\pm 15\%$  of the nominal value with a CV%  $\leq 15\%$ .

**Incurred sample reanalysis.** Reproducibility or incurred sample reanalysis (ISR) was verified by repeating the analysis of a subset of patients' samples (n = 14) in separate runs. The

two analyses could be considered equivalent if the percentage difference [expressed as: (repeat-original)\*100/mean] between the first and the second concentration measured was within  $\pm 20\%$  for at least 67% of the samples.

### Application of the method to patient samples

The proposed method was developed in the context of an analytical cross-validation study (CRO-2018-83) ongoing at the National Cancer Institute (*Centro di Riferimento Oncologico—CRO*) of Aviano. The study aims at assessing the reliability of innovative analytical methods based on Dried Blood Spot (DBS) for the quantification of several anticancer drugs, including LENVA, by comparing such methods with the Gold Standard LC-MS/MS methods in plasma. The proposed method was used as a reference method to quantify LENVA concentration in plasma samples from HCC patients recruited in the study from October 2020 to July 2021. Patients entered the study according to the following eligibility criteria: 1) to be treated with LENVA according to the routine clinical practice at any dose and any treatment cycle; 2) age  $\geq 18$  years; 3) life expectancy  $> 3$  months; 4) provide a signed written informed consent. Blood samples were collected into 2.7 mL K-EDTA tubes after at least 7 days of treatment (time necessary to reach the steady-state) at each clinical visit of patients (about every month). Plasma was obtained immediately by centrifugation of the blood samples at 2600 g for 10 min at 4 °C. The obtained plasma was split into three independent aliquots and stored at -80 °C until analysis.

### Ethics statement regarding patients' samples

The analytical cross-validation study (protocol code: CRO-2018-83) was approved by the local ethics committee (*Comitato Etico Unico Regionale- C.E.U.R.*) and is conducted according to the Declaration of Helsinki principles [16]. Patients were informed by the oncologist about the analytical study during their visits and were recruited only after the signature of written informed consent.

## Results and discussion

### LC-MS/MS conditions

The electrospray ionization source (ESI) was set in positive ion mode, thus LENVA and IS mainly produced protonated molecules  $[M+H^+]$  for the presence of amino groups. Source dependent parameters were optimized as follows: the temperature was set at 550 °C, nebulizer gas pressure was 50 psi and that of the heater gas was of 40 psi (zero air), curtain gas flow was regulated at a pressure of 35 psi and that of the collision gas (CAD) at 6 (nitrogen), ion spray voltage was 5500 V. The most intense daughter ion for LENVA, which  $m/z$  was 370.4, was used as a quantifier transition, while the fragment ions used as qualifiers were 312.2  $m/z$  and 344.0  $m/z$ . The quantification of the IS signal was conducted using the following transition: 370.4  $m/z$  as a quantifier, while 312.4  $m/z$  and 217.5  $m/z$  as qualifiers. The fragmentation patterns obtained within the collision cell are represented in Fig 1 and reported in Table 2 along with the optimized compound-dependent parameters.

Different mobile phases were tested (e. g., acetonitrile with 0.10% formic acid (v/v) or methanol with 0.10% formic acid (v/v) both tested alone or mixed with isopropanol) and the best results in terms of peak shape and sensitivity were obtained with methanol/isopropanol (90:10, v/v) with 0.10% of formic acid (v/v) as eluent B and ultrapure water plus 0.10% formic acid (v/v) as eluent A. The chromatographic analysis was obtained using a flow rate of 0.60 mL/min, setting column temperature at 50 °C and applying the following gradient: the percentage of

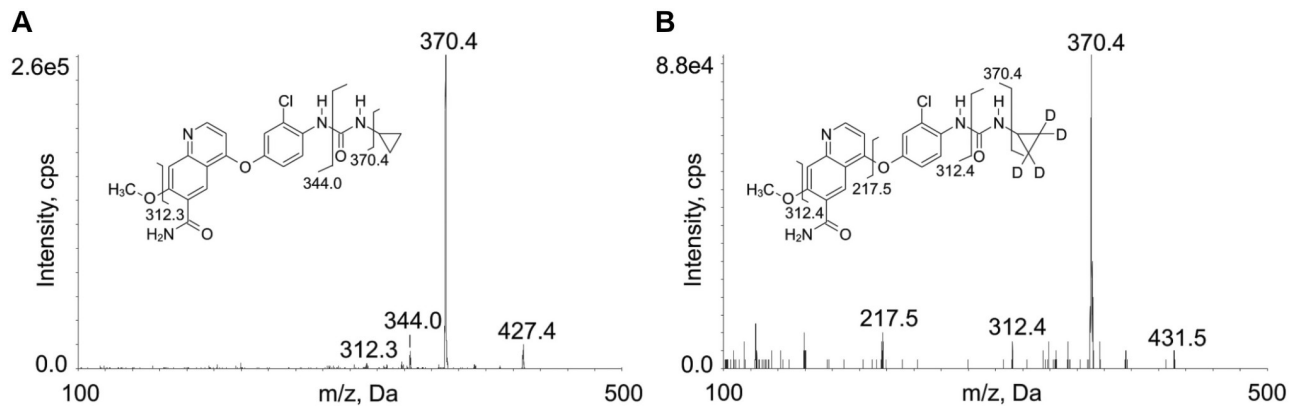

**Fig 1.** MS/MS mass spectra with chemical structures and identification of the fragment ions of LENVA (A) and internal standard (LENVA-D<sub>4</sub>) (B); spectra were recorded with CE = 40 V. LENVA fragment at 312.3 *m/z* derived from 344.0 *m/z* fragment by the loss of methoxy group.

<https://doi.org/10.1371/journal.pone.0259137.g001>

eluent B (methanol/isopropanol (90:10, v/v) with 0.10% of formic acid (v/v), eluent A: ultra-pure water plus 0.10% formic acid (v/v)) was increased from the starting condition of 5% to 98% in 1.50 min, and then kept constant for 1.15 min to ensure an efficient-column washing; the initial condition was then restored in 0.10 min, and the column was re-equilibrated for 1.25 min. The total run time was 4.00 min. Fig 2 displays typical SRM chromatograms of plasma samples: an extracted blank plasma sample (Fig 2A), a zero blank sample containing IS only (Fig 2B), an extracted plasma sample at the LLOQ (Fig 2C), and a sample from a patient collected 4.5 hours after drug intake (dose 12 mg) with a measured LENVA concentration of 99.6 ng/mL (Fig 2D). As shown from the figure, the analyte was rapidly eluted, with a retention time of 1.40 min.

## Validation procedures

Recovery, matrix effect and selectivity. The percentage of LENVA recovery resulted high,  $\geq 95.6\%$  (range from 95.6 to 102, CV%  $\leq 4.6$ ), and reproducible over the concentrations ranges

**Table 2.** Optimized compound-dependent parameters of LENVA and LENVA-D<sub>4</sub> (IS).

| Compound | Q1 <sup>a</sup> (m/z) | DP <sup>b</sup> (V) | EP <sup>c</sup> (V) | Q3 <sup>d</sup> (m/z) | CE <sup>e</sup> (V) | CXP <sup>f</sup> (V) |
|----------|-----------------------|---------------------|---------------------|-----------------------|---------------------|----------------------|
| LENVA    | 427.4                 | 140                 | 10                  | 370.4                 | 37                  | 10                   |
|          |                       |                     |                     | 312.2                 | 60                  | 10                   |
|          |                       |                     |                     | 344.0                 | 40                  | 10                   |
| LENVA-D4 | 431.5                 | 120                 | 10                  | 370.4                 | 40                  | 10                   |
|          |                       |                     |                     | 312.4                 | 60                  | 10                   |
|          |                       |                     |                     | 217.5                 | 30                  | 10                   |

<sup>a</sup>first quadrupole mass;

<sup>b</sup>declustering potential;

<sup>c</sup>entrance potential;

<sup>d</sup>third quadrupole mass;

<sup>e</sup>collision energy;

<sup>f</sup>collision cell exit potential.

<https://doi.org/10.1371/journal.pone.0259137.t002>

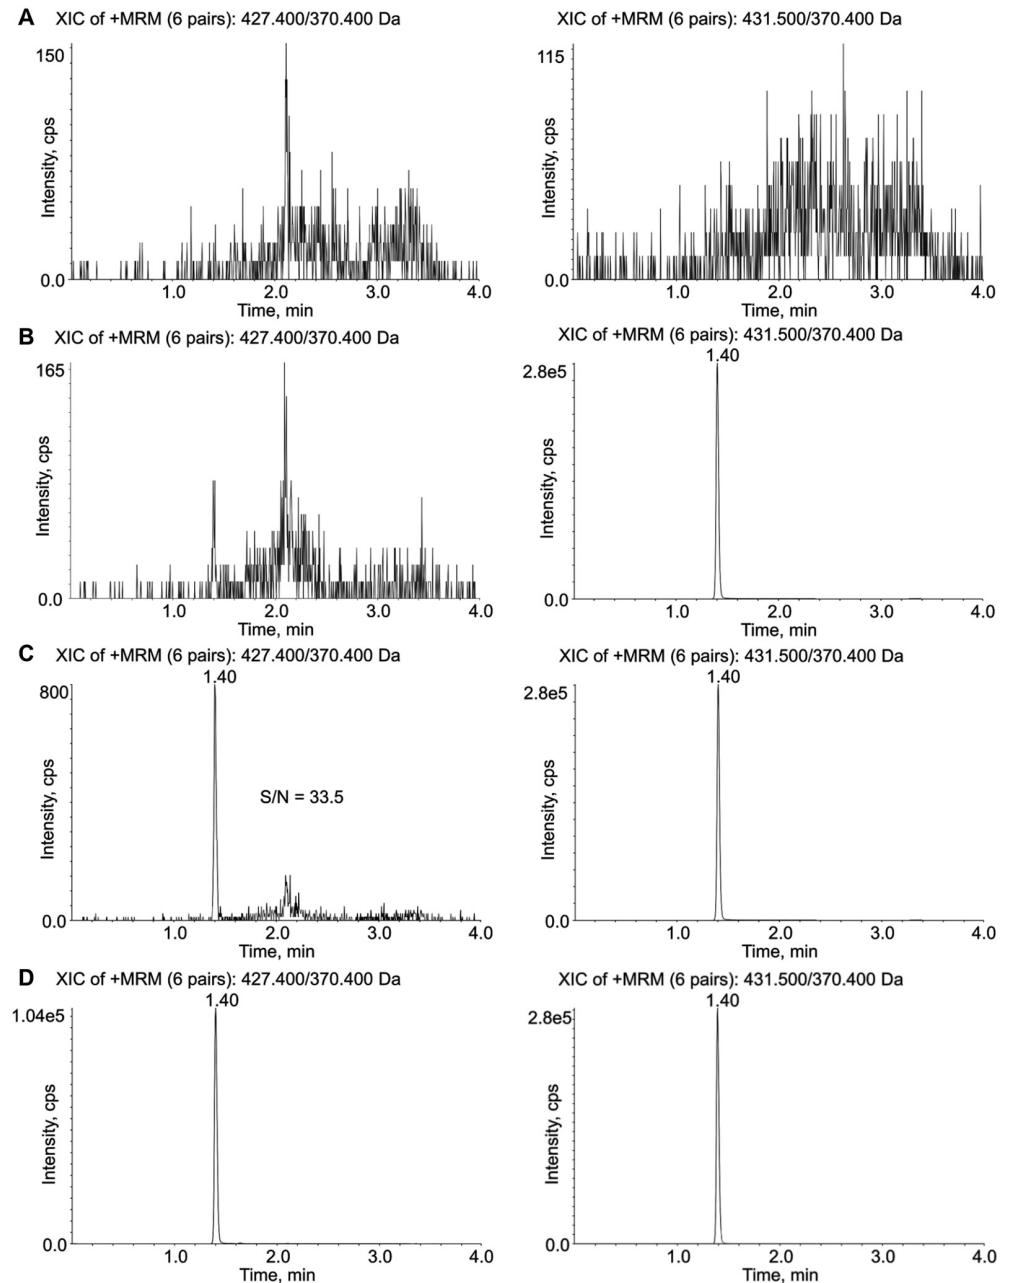

**Fig 2. MRM chromatograms for LENVA (left panels) and internal standard (right panels).** A: blank plasma sample; B: blank plasma sample with IS (50 ng/mL); C: LLOQ (0.50 ng/mL) with S/N value; D: MRM chromatograms of plasma sample from a patient treated with 12 mg/day LENVA and showing a drug concentration of 99.6 ng/mL.

<https://doi.org/10.1371/journal.pone.0259137.g002>

tested (Table 3). These percentages are the highest (89.5%) among the published methods (Table 1) based on the same sample treatment (PP) [7, 9, 12, 13].

Both the qualitative test of post-column infusion and the quantitative analysis obtained from the ratio between the analytes peak area in the presence of matrix (single donor plasma) and the peak area in the absence of matrix (methanol) using QCs, demonstrated the presence of a matrix effect. In fact, an enhancement of extracted ions signals (XIC) was detected at the



**Table 3. Recovery and matrix effect (ME) results of LENVA and LENVA-D<sub>4</sub> in human plasma samples.**

| Compound             | Nominal concentration (ng/ml) | Mean Recovery (%)±SD | CV% | Mean ME (%)±SD | CV% |
|----------------------|-------------------------------|----------------------|-----|----------------|-----|
| LENVA                | 1.50                          | 95.6±4.3             | 4.5 | 157 ±3.9       | 2.5 |
|                      | 75.0                          | 97.8±4.5             | 4.6 | -              | -   |
|                      | 1500                          | 102 ±1.6             | 1.6 | 136 ±3.1       | 2.3 |
| LENVA-D <sub>4</sub> | 50.0                          | -                    | -   | 125 ±7.0       | 5.6 |

<https://doi.org/10.1371/journal.pone.0259137.t003>

retention time of the analytes, compared to those obtained in the pure solvent, as reported in Table 3. A variability on the estimated matrix effect (%ME) for LENVA was observed according to the concentration level (136 for QCH and 157 for QCL), whereas, within the concentration levels, results were highly reproducible with a %CV always < 2.5%. The %ME for LENVA-D<sub>4</sub> resulted 125% with a CV% < 5.6%. The IS normalized matrix effect was 1.27±0.03 (SD) with a CV% ≤ 2.8% for QCL and 1.09±0.02 (SD) for QCH with a CV% ≤ 2.1. These data are slightly higher than previously published methods based on PP but with a much lower CV% [10, 12, 13]. The obtained CV% values were lower than the guidelines acceptance criteria (<15%) and so the matrix effect was considered negligible in affecting analyses results.

The selectivity of the proposed method was proved by analyzing 6 blank plasma samples from 6 different donors: no interference was detected at the retention time of the analyte (Fig 2A).

**Linearity and sensitivity.** The linearity of the method was demonstrated over the selected concentrations (2000, 1000, 500, 100, 40.0, 15.0, 3.00 and 0.50 ng/mL) preparing 8 calibration curves: the mean R value obtained was 0.999±0.001. Moreover, the calculated accuracy was between 95.9 and 105%, and precision was within 5.0%. In Table 4 the complete list of accuracy and precision data is reported.

Concerning the method sensitivity, the accuracy and precision (CV%) obtained for the 6 LLOQ samples (0.50 ng/mL) prepared in pooled blank human plasma were 98.4% and 10.0%, respectively. The S/N ratio obtained was always > 21 (Fig 2C).

**Intra- and inter-day precision and accuracy.** The intra-day precision and accuracy for LENVA, in 6 samples at each QC level and at the LLOQ, resulted to be ≤ 10.0% and between 96.3 and 109%, respectively. At the same time, inter-day precision and accuracy, tested on 5 different working days in triplicate for each QC level and the LLOQ, were ≤ 11.3% and between 98.0 and 108%, respectively.

The obtained data of intra- and inter-day precision and accuracy, reported in Table 5, complied with FDA and EMA requirements.

**Table 4. Precision (CV%) and accuracy %data of LENVA calibration curves in human plasma.**

| LENVA (N = 8)                |                   |     |           |
|------------------------------|-------------------|-----|-----------|
| Nominal concentration(ng/mL) | Mean ± SD (ng/mL) | CV% | Accuracy% |
| 0.50                         | 0.50 ± 0.00       | 0.9 | 99.5      |
| 3.00                         | 3.08 ± 0.15       | 5.0 | 103       |
| 15.0                         | 15.7 ± 0.76       | 4.8 | 105       |
| 40.0                         | 41.5 ± 0.82       | 2.0 | 104       |
| 100                          | 102 ± 2.44        | 2.4 | 102       |
| 500                          | 489 ±1 5.4        | 3.1 | 97.9      |
| 1000                         | 959 ± 35.6        | 3.7 | 95.9      |
| 2000                         | 1918 ± 89.2       | 4.7 | 95.9      |

<https://doi.org/10.1371/journal.pone.0259137.t004>

**Table 5. Intra- and inter-day precision (CV%) and accuracy % obtained for LENVA.**

| Intra-day (N = 6)             |                       |      |           |
|-------------------------------|-----------------------|------|-----------|
| Nominal concentration (ng/mL) | Mean $\pm$ SD (ng/mL) | CV%  | Accuracy% |
| 0.50 (LLOQ)                   | 0.49 $\pm$ 0.05       | 10.0 | 98.4      |
| 1.50                          | 1.59 $\pm$ 0.03       | 1.7  | 106       |
| 75.0                          | 81.7 $\pm$ 2.19       | 2.7  | 109       |
| 1500                          | 1445 $\pm$ 34.5       | 2.4  | 96.3      |
| Inter-day (N = 15)            |                       |      |           |
| Nominal concentration (ng/mL) | Mean $\pm$ SD (ng/mL) | CV%  | Accuracy% |
| 0.50 (LLOQ)                   | 0.50 $\pm$ 0.06       | 11.3 | 101       |
| 1.50                          | 1.60 $\pm$ 0.08       | 4.9  | 107       |
| 75.0                          | 80.6 $\pm$ 3.7        | 4.5  | 108       |
| 1500                          | 1469 $\pm$ 97.9       | 6.7  | 98.0      |

<https://doi.org/10.1371/journal.pone.0259137.t005>

**Stability and dilution integrity.** LENVA stability in plasma matrix was proved under handling and storage conditions. Bench-top stability was assessed after 4 h at room temperature with precision and accuracy within 10.9% and between 95.1% and 109%, respectively. LENVA was stable in plasma after 3 freeze ( $-80^{\circ}\text{C}$ )/thaw cycles (precision and accuracy values were  $\leq 6.3\%$  and between 93.1 and 103%, respectively) and after 315 days of storage at  $-80^{\circ}\text{C}$  (precision  $\leq 4.1\%$  and an accuracy between 87.7 and 103%). These data are in line with those reported by the other methods presented in Table 1. With the proposed method, the long term stability in human plasma was tested and verified for a longer period (315 days vs 6 months). LENVA resulted stable also in extracted (deproteinized) plasma samples in autosampler set at  $4^{\circ}\text{C}$  for 94 h, as proved by precision  $\leq 4.6\%$  and accuracy between 89.3 and 103%. The stability of LENVA in solvents was also assessed as follow: for at least 174 days both in DMSO stored at  $-80^{\circ}\text{C}$  (stock solution) and in methanol stored at  $-20^{\circ}\text{C}$  (working solutions) with a precision  $\leq 5.6\%$  and accuracy between 89.1 and 109% (S1 Table).

The dilution integrity of plasma samples was assessed at two dilution factors: 1:10 and 1:100 with a very good precision and accuracy (S2 Table).

**Incurred sample reanalysis.** This new quantification method was also reproducible, as demonstrated by the % difference between the two measurements of 14 plasma samples from 6 patients treated with LENVA and analyzed in two different working days. The % difference was between  $-9.20\%$  and  $17.5\%$  (Fig 3), within the  $\pm 20\%$  requirements of FDA and EMA guidelines [14, 15].

Even if the ISR is not requested by FDA guideline, we considered it an important test to verify the method reproducibility in “real” samples. Anyway, only the method proposed by Ye et al. [13] performed the ISR on 24 clinical samples with a very good %difference ( $-4.5\%$  to  $3.1\%$ ).

**Application of the method to clinical samples and reproducibility.** The presented method was used to successfully quantify 22 plasma samples from 6 patients affected by HCC, treated with LENVA, and recruited in the ongoing above-mentioned analytical study. The patients’ characteristics and the drug dosage are reported in Table 6.

Blood samples were taken between 1.5 and 25.5 h from the last drug assumption. The concentrations found in the samples are reported in Fig 4 and S3 Table. All the samples collected were at the steady-state. The linear range of the calibration curve has demonstrated to be suitable for clinical application since all the quantified samples were within the LLOQ and ULOQ. From the few samples collected no conclusive considerations can be drawn, however, a certain

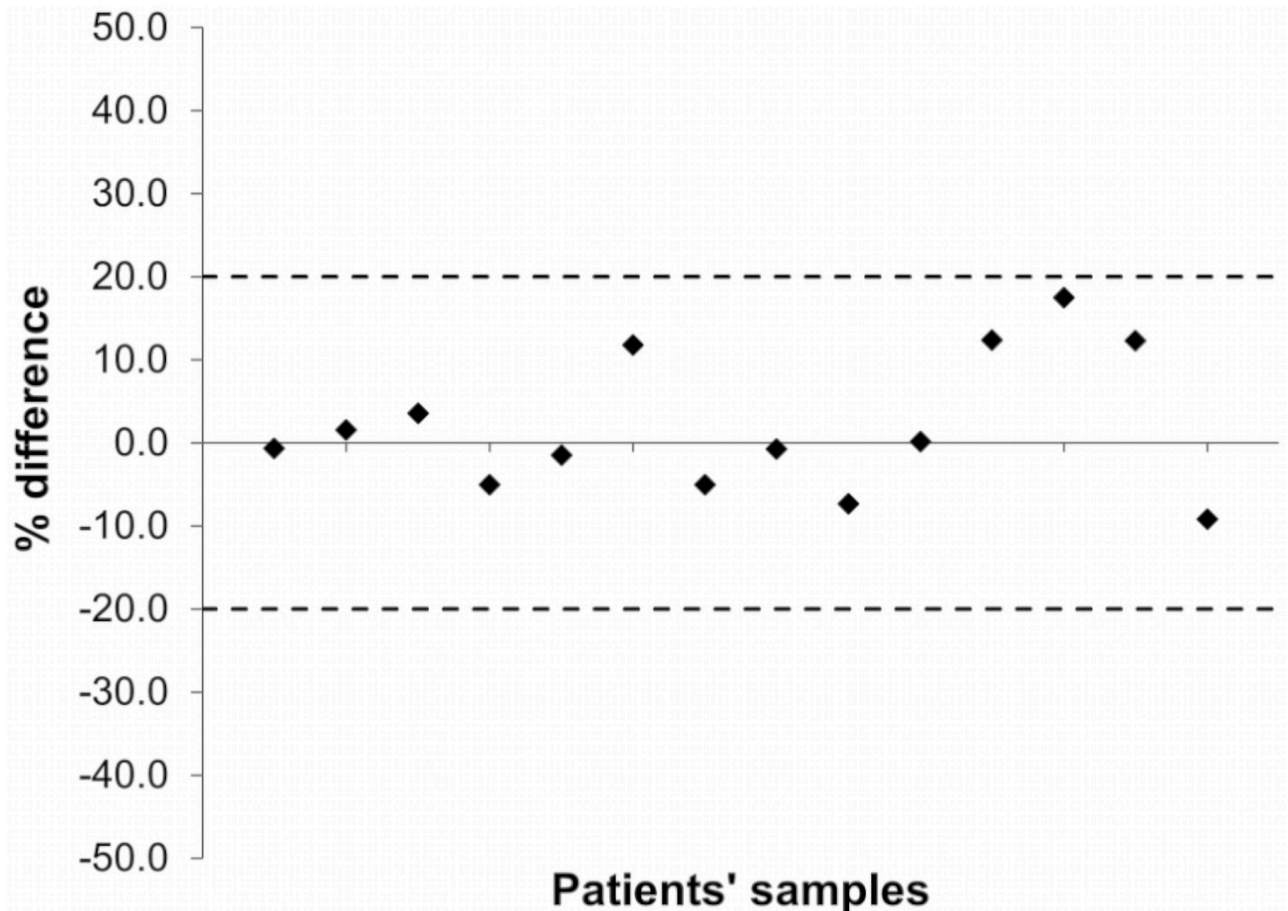

**Fig 3. Incurred samples reanalysis: Percentage difference between the first and the second analysis for 14 plasma samples from 6 patients.** The dotted lines represent the  $\pm 20\%$  deviation limits imposed by EMA and FDA guidelines.

<https://doi.org/10.1371/journal.pone.0259137.g003>

inter-patients variability in drug concentration can be hypothesized by comparing samples of patients treated at the same dosage and collected at comparable times. For instance, considering patients treated with LENVA at 8 mg/day, five samples (7, 9, 12–18), collected around the  $C_{\min}$  (at  $24 \pm 1.5$  h), displayed a concentration value that spans from 9.1 ng/mL (sample 12) to 91.6 ng/mL (sample 9) and just two of them were above the proposed  $C_{\min}$  target of 51.5 ng/mL; three samples (2, 10 and 11) collected at about  $17 (\pm 0.5)$  h since last drug intake showed a comparable variability (17.3–68.7 ng/mL), while two samples (2 and 7) collected at 4.50 h from

**Table 6. Principal demographic and clinical patients' characteristics.**

| Patients characteristics | N                      |
|--------------------------|------------------------|
| Sex                      | 4males                 |
|                          | 2 females              |
| Mean age (range)         | 74 (61–82) years       |
| Therapy                  | 6 samples at 4 mg/day  |
|                          | 15 samples at 8 mg/day |
|                          | 1 sample at 12 mg/day  |

<https://doi.org/10.1371/journal.pone.0259137.t006>

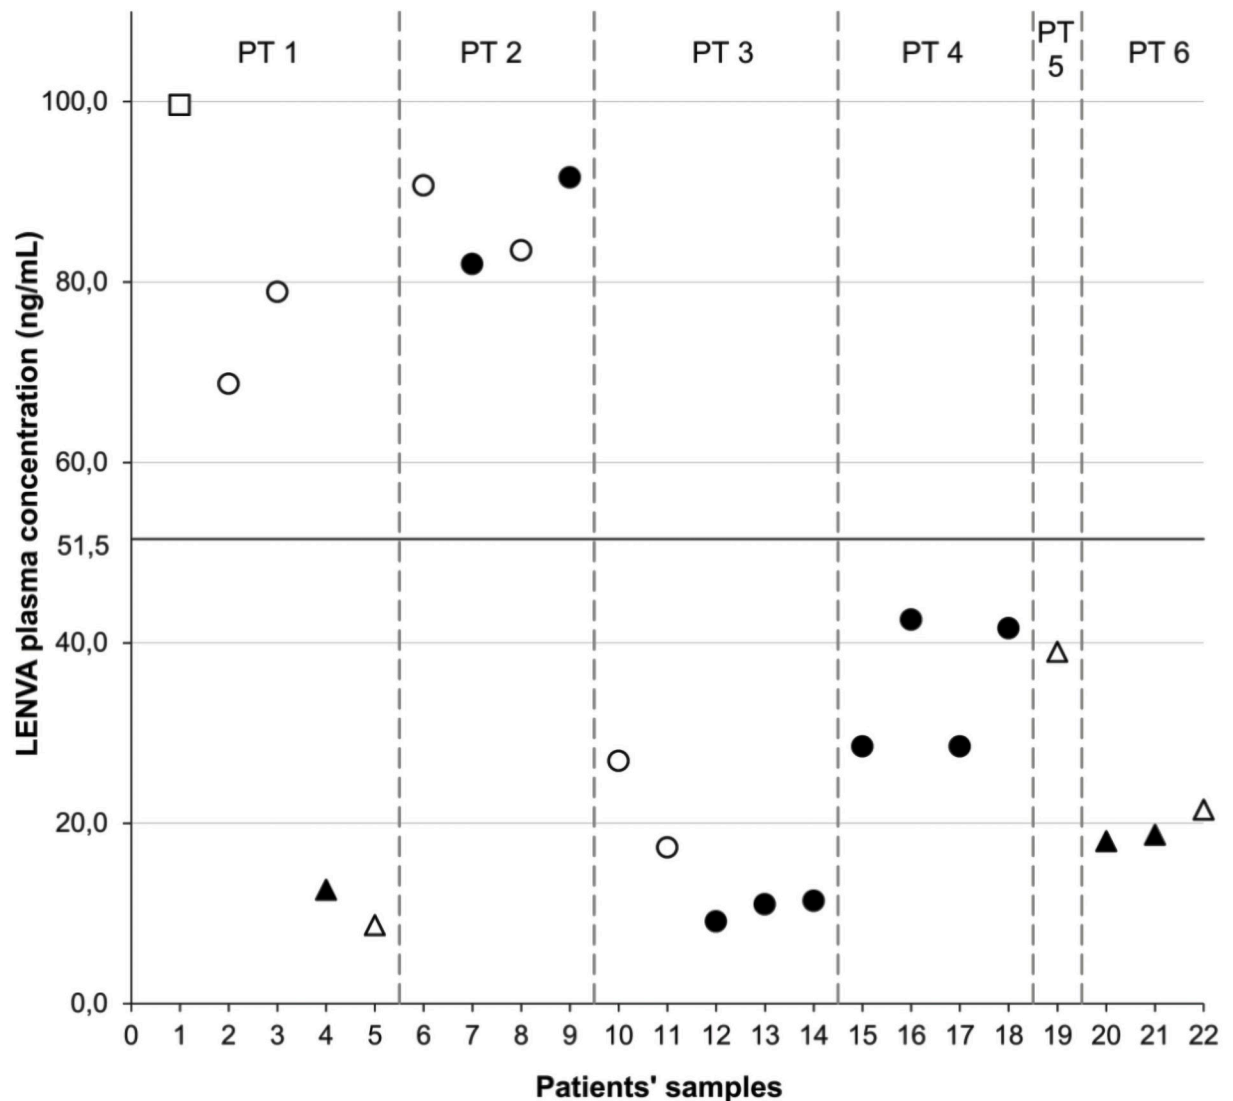

**Fig 4. Graphical representation of LENVA concentrations in patients' plasma samples.** (□) corresponds to sample at the dose of 12 mg/day of LENVA collected not at the  $C_{min}$ ; (●) 8 mg/day at the  $C_{min}$  and (○) not at the  $C_{min}$ ; (▲) 4 mg/day at the  $C_{min}$  and (△) not at the  $C_{min}$ . The line at 51.5 ng/mL corresponds to the mean  $C_{min}$  reported in the literature as proposed TDM threshold.

<https://doi.org/10.1371/journal.pone.0259137.g004>

last drug administration, exhibited a lower variability (90.7 ng/mL and 78.9 ng/mL). As regards the dosage of 4 mg/day, the concentration of four samples from 2 patients collected approximately at the  $C_{min}$  ( $24 \pm 1.5$  h) can be described: within patient variability was low, while mean concentration between the two patients is slightly different (10.6 ng/mL vs 18.3 ng/mL).

Generally, a certain intra-patient stability of concentrations was observed when comparing multiple samplings at the same drug dosage collected at comparable times. This observation, even descriptive, corroborates the suitability of LENVA as a candidate for TDM [17, 18].

The wide analytical range of the new proposed method represents an advantage respect the method developed by Janssen et al. [10], that quantified simultaneously other different kinase

inhibitors and with a comparable run time (4 min). In fact, 3 out of 22 patients plasma samples that we quantified had a LENVA concentration lower than their LLOQ (10 ng/mL).

## Conclusions

LC-MS/MS analytical methods for TDM application should meet the demands for low sample volumes, simplicity of sample preparation, short run times, reliability, robustness, selectivity, precision, sensitivity, and cost-effectiveness. We developed a new LC-MS/MS method for LENVA quantification in human plasma which required just 100  $\mu$ L of patient's plasma. Samples are rapidly processed by PP with the addition of 5 volumes of methanol containing LENVA-D<sub>4</sub> as IS. Finally, the method has a very short run-time of just 4 min, an easy sample preparation based on PP and ISR proved its robustness and reliability.

The proposed method was characterized by a wide analytical range (0.50–2000 ng/mL) which not only properly covered the therapeutic plasma concentrations of HCC patients, but also makes it applicable for PK investigations in patients affected by other pathologies which require the use of LENVA at higher doses (24 mg/day), in which the mean value of  $C_{max}$  at steady state ranged from 430–660 ng/mL [19] or even for hypothetical future applications whether higher doses of LENVA may be investigated. Moreover, the method fully complied with the most recent requirements of both EMA and FDA guidelines for the validation of bio-analytical assays [14, 15]. Even if this fast and simple LC-MS/MS quantification method is suitable for TDM application in clinical practice, a further improvement could be represented by the use of dried blood spot (DBS) as matrix for LENVA quantification. In fact, the use of DBS could, for instance, increase patient's compliance, reduce analysis costs and facilitate samples storage. Thus, the development of a LC-MS/MS method based on DBS matrix could be of considerable interest in this context. The proposed method can be used as reference assay to clinically validate the DBS-based method [20].

## Supporting information

**S1 Table. Short and long-term stability with precision (CV%) and accuracy% obtained for LENVA.**

(DOCX)

**S2 Table. Precision (CV%) and accuracy % data of LENVA dilution integrity in human plasma.**

(DOCX)

**S3 Table. LENVA concentrations found in 22 plasma samples from 6 patients.**

(DOCX)

## Acknowledgments

We thank the patients for their participation in the analytical cross-validation study and the research nurse Oriana Borghese for sampling collection. We thank *Ministero della Salute Ricerca Corrente* for its support.

## Author Contributions

**Investigation:** Martina Zanchetta, Valentina Iacuzzi, Bianca Posocco, Giorgia Bortolin, Ariana Soledad Poetto, Marco Orleni, Giovanni Canil.

**Resources:** Michela Guardascione, Luisa Foltran, Valentina Fanotto, Fabio Puglisi.

**Supervision:** Bianca Posocco, Sara Gagno, Giuseppe Toffoli.

**Validation:** Martina Zanchetta, Valentina Iacuzzi, Sara Gagno.

**Visualization:** Martina Zanchetta.

**Writing – original draft:** Martina Zanchetta.

**Writing – review & editing:** Bianca Posocco, Sara Gagno, Giuseppe Toffoli.

## References

1. Kudo M, Finn RS, Qin S, Han K-H, Ikeda K, Piscaglia F, et al. Lenvatinib versus sorafenib in first-line treatment of patients with unresectable hepatocellular carcinoma: a randomised phase 3 non-inferiority trial. *The Lancet*. 2018 Mar; 391(10126):1163–73. [https://doi.org/10.1016/S0140-6736\(18\)30207-1](https://doi.org/10.1016/S0140-6736(18)30207-1) PMID: 29433850
2. FDA. LENVIMA (lenvatinib) [Internet]. 2019 [cited 2021 Apr 27]. [https://www.accessdata.fda.gov/drugsatfda\\_docs/label/2019/206947s011bl.pdf](https://www.accessdata.fda.gov/drugsatfda_docs/label/2019/206947s011bl.pdf)
3. EMA. Lenvima-epar product information [Internet]. 2021 [cited 2021 Apr 27]. [https://www.ema.europa.eu/en/documents/product-information/lenvima-epar-product-information\\_en.pdf](https://www.ema.europa.eu/en/documents/product-information/lenvima-epar-product-information_en.pdf)
4. Verheijen RB, Yu H, Schellens JHM, Beijnen JH, Steeghs N, Huitema ADR. Practical Recommendations for Therapeutic Drug Monitoring of Kinase Inhibitors in Oncology. *Clinical Pharmacology & Therapeutics*. 2017 Nov; 102(5):765–76.
5. Hata K, Suetsugu K, Egashira N, Makihara Y, Itoh S, Yoshizumi T, et al. Association of lenvatinib plasma concentration with clinical efficacy and adverse events in patients with hepatocellular carcinoma. *Cancer Chemotherapy and Pharmacology*. 2020 Dec; 86(6):803–13. <https://doi.org/10.1007/s00280-020-04178-x> PMID: 33095285
6. Nagahama M, Ozeki T, Suzuki A, Sugino K, Niioka T, Ito K, et al. Association of lenvatinib trough plasma concentrations with lenvatinib-induced toxicities in Japanese patients with thyroid cancer. *Med Oncol*. 2019 Mar 27; 36(5):39. <https://doi.org/10.1007/s12032-019-1263-3> PMID: 30919115
7. Dubbelman AC, Rosing H, Thijssen B, Gebretensae A, Lucas L, Chen H, et al. Development and validation of LC–MS/MS assays for the quantification of E7080 and metabolites in various human biological matrices. *Journal of Chromatography B*. 2012 Mar; 887–888:25–34. <https://doi.org/10.1016/j.jchromb.2012.01.004> PMID: 22309776
8. Srikanth I, Prameela Rani A. Development and validation of liquid chromatography coupled with tandem mass spectrometry method for estimation of lenvatinib in human plasma. *Asian Journal of Pharmaceutical and Clinical Research*. 2017 Jul 1; 10(7):120.
9. Ogawa-Morita T, Sano Y, Okano T, Fujii H, Tahara M, Yamaguchi M, et al. Validation of a Liquid Chromatography-Tandem Mass Spectrometric Assay for Quantitative Analysis of Lenvatinib in Human Plasma. *International Journal of Analytical Chemistry*. 2017; 2017:1–6. <https://doi.org/10.1155/2017/2341876> PMID: 28680445
10. Janssen JM, de Vries N, Venekamp N, Rosing H, Huitema ADR, Beijnen JH. Development and validation of a liquid chromatography-tandem mass spectrometry assay for nine oral anticancer drugs in human plasma. *Journal of Pharmaceutical and Biomedical Analysis*. 2019 Sep; 174:561–6. <https://doi.org/10.1016/j.jpba.2019.06.034> PMID: 31255856
11. Sueshige Y, Shiraiwa K, Honda K, Tanaka R, Saito T, Tokoro M, et al. A Broad Range High-Throughput Assay For Lenvatinib Using Ultra-High Performance Liquid Chromatography Coupled To Tandem Mass Spectrometry With Clinical Application In Patients With Hepatocellular Carcinoma. *Therapeutic Drug Monitoring* [Internet]. 2021 Feb 3 [cited 2021 Apr 27]; Publish Ahead of Print. <https://journals.lww.com/10.1097/FTD.0000000000000872> PMID: 34521802
12. Aghai F, Zimmermann S, Kurlbaum M, Jung P, Pelzer T, Klinker H, et al. Development and validation of a sensitive liquid chromatography tandem mass spectrometry assay for the simultaneous determination of ten kinase inhibitors in human serum and plasma. *Analytical and Bioanalytical Chemistry*. 2021 Jan; 413(2):599–612. <https://doi.org/10.1007/s00216-020-03031-7> PMID: 33155133
13. Ye Z, Wu L, Zhang X, Hu Y, Zheng L. Quantification of sorafenib, lenvatinib, and apatinib in human plasma for therapeutic drug monitoring by UPLC-MS/MS. *Journal of Pharmaceutical and Biomedical Analysis*. 2021 Aug; 202:114161. <https://doi.org/10.1016/j.jpba.2021.114161> PMID: 34052550
14. FDA. Bioanalytical Method Validation Guidance for Industry. 2018; <https://www.fda.gov/files/drugs/published/Bioanalytical-Method-Validation-Guidance-for-Industry.pdf>
15. EMA. Guideline on bioanalytical method validation [Internet]. 2011. [https://www.ema.europa.eu/en/documents/scientific-guideline/guideline-bioanalytical-method-validation\\_en.pdf](https://www.ema.europa.eu/en/documents/scientific-guideline/guideline-bioanalytical-method-validation_en.pdf)

16. WMA—The World Medical Association-WMA Declaration of Helsinki—Ethical Principles for Medical Research Involving Human Subjects [Internet]. [cited 2021 Sep 8]. <https://www.wma.net/policies-post/wma-declaration-of-helsinki-ethical-principles-for-medical-research-involving-human-subjects/>
17. Liefwaard L, Chen C. Quantifying the Effectiveness of Dose Individualization by Simulation for a Drug With Moderate Pharmacokinetic Variability. *Therapeutic Drug Monitoring*. 2015 Oct; 37(5):641–8. <https://doi.org/10.1097/FTD.000000000000194> PMID: 26378372
18. Chatelut E, Bruno R, Ratain MJ. Intraindividual Pharmacokinetic Variability: Focus on Small-Molecule Kinase Inhibitors. *Clinical Pharmacology & Therapeutics*. 2018 Jun; 103(6):956–8. <https://doi.org/10.1002/cpt.937> PMID: 29194586
19. FDA. Clinical pharmacology and biopharmaceutics review(s). Application number: 206947Orig1s000 [Internet]. [cited 2021 Apr 27]. [https://www.accessdata.fda.gov/drugsatfda\\_docs/nda/2015/206947Orig1s000ClinPharmR.pdf](https://www.accessdata.fda.gov/drugsatfda_docs/nda/2015/206947Orig1s000ClinPharmR.pdf)
20. Iacuzzi V, Posocco B, Zanchetta M, Gagno S, Poetto AS, Guardascione M, et al. Dried Blood Spot Technique Applied in Therapeutic Drug Monitoring of Anticancer Drugs: a Review on Conversion Methods to Correlate Plasma and Dried Blood Spot Concentrations. *Pharm Res*. 2021 May 1; 38(5):759–78. <https://doi.org/10.1007/s11095-021-03036-6> PMID: 33846903
